# Supplementary material for: Awaking N-hyperfine couplings in charged yttrium nitride endohedral fullerenes
Source: Royal Society of Chemistry journal article supplement (doi:10.1039/c7cp05444k), 2017-01-01
Supplement: c7cp05444k1.pdf [file c7cp05444k1.pdf]

## Supporting Information

### Awake N-hyperfine Couplings in Charged Yttrium Nitride

#### Endohedral Fullerenes

**Chong Zhao,<sup>ab</sup> Taishan Wang,<sup>a\*</sup> Yongjian Li,<sup>ab</sup> Haibing Meng,<sup>ab</sup> Mingzhe Nie,<sup>ab</sup> Jianlei Tian,<sup>ac</sup> Chunru Wang<sup>a\*</sup>**

<sup>a</sup>Beijing National Laboratory for Molecular Sciences, Key Laboratory of Molecular Nanostructure and Nanotechnology, Institute of Chemistry, Chinese Academy of Sciences, Zhongguancun North First Street 2, 100190 Beijing, China

<sup>b</sup>University of Chinese Academy of Sciences, Beijing 100049, China

<sup>c</sup>Southwest University, School of Chemistry & Chemical Engineering, Beibei, Chongqing 400715, China

E-mail: wangtais@iccas.ac.cn; crwang@iccas.ac.cn

#### Contents

**Experimental section:** Preparation and characterization of  $Y_3N@C_{2n}$  ( $n = 40 - 44$ ); the preparation and the ESR measurement of K metal-reduced anion radical of  $Y_3N@C_{2n}$  ( $n = 40 - 44$ ); the simulation of the ESR spectra of  $Y_3N@C_{80}$  and  $Y_3N@C_{86}$  anion radicals.

**Computational section:** DFT-based computations about the structures, hfcc, BOMD, and spin distributions of  $Y_3N@C_{2n}$  ( $n = 40 - 44$ ).

Figure S1. Experimental ESR spectra of the K metal-reduced anion radicals of  $Y_3N@C_{2n}$  ( $n = 40-44$ ) in THF at room temperature.

Table S1. The calculated  $d_{N-Y/C-Y/Y-Y}$  data.

Figure S2. Molecular dynamics simulations (298K) of  $Y_3N@C_{80}$  and  $Y_3N@C_{80}^-$ .

Figure S3. The spin differences of the anion radicals of  $Sc_3N@C_{80-I_h}$  and  $Y_3N@C_{80-I_h}$ .

Table S2. The  $d_{N-plane}$  and  $\Delta E$  of the clusters  $(Y_3N)^{6+}$  from  $Y_3N@C_{80}$  to  $Y_3N@C_{88}$ .

## Experimental section:

The empty graphite rods were filled with a mixture of Y/Ni<sub>2</sub> alloy and graphite powder in a weight ratio of 3:2. These rods were then vaporized in a Krätschmer-Huffman generator at 194 Torr He and 6 Torr N<sub>2</sub>, the current was kept at 25 A. The resulting soot was Soxlet-extracted with toluene for 12 h. Then the pure Y<sub>3</sub>N@C<sub>2n</sub> (n = 40 - 44) were isolated by multi-stage HPLC separately.

For radicals' ESR experiments, firstly, the Y<sub>3</sub>N@C<sub>2n</sub> (n = 40 - 44) radical samples were carefully dissolved in de-oxygenated tetrahydrofuran(THF) by the vacuum-pumping de-aerating device with a nitrogen-flowing process within ESR tube. Then the tube was blocked by rubber seal and transferred to the ESR spectrometer and performed by repeated contact with K metal in a loop until the ESR signal was appeared. ESR spectra were measured at room temperature using X-band ESR spectrometer (Bruker E500) with continuous-wave X band, the measure power Attention is 13.0 dB, the Frequency is 9.848 GHz. And the spectra were simulated with easyspin package encoded in MATLAB platform. <sup>1</sup>

## Computational section:

All conformers of Y<sub>3</sub>N@C<sub>2n</sub> (n = 40 - 44) and related anion radicals were firstly optimized using original pm6 and b3lyp/3-21g\* to speed up the computational process, the final optimizations and spin distributions were carried out by B3LYP and TPSSh methods within lanl2de basis for Y and 6-31g\* for C, N. The above calculations were performed using the Gaussian 09 quantum chemical program package.<sup>2</sup> Computations of hfcc constants by ORCA package<sup>3</sup> were performed with the open-shell method of UKS at the BP86/TZVP level using RI approximation. The BOMD (Born-Oppenheimer molecular dynamics) calculations were performed in CP2K code<sup>4,5</sup> and employed Velocity Verlet algorithm with the time step of 1 fs at the temperature of 298 K. The trajectories and spin population distributions were computed by the PBE functional and employed Gaussian and Plane Wave (GPW) scheme with Goedecker-Teter-Hutter (GTH) pseudopotentials and DZVP basis set.<sup>5-7</sup> The structures and isosurfaces were visualized with GaussView, the trajectories were visualized with VMD.<sup>8</sup>

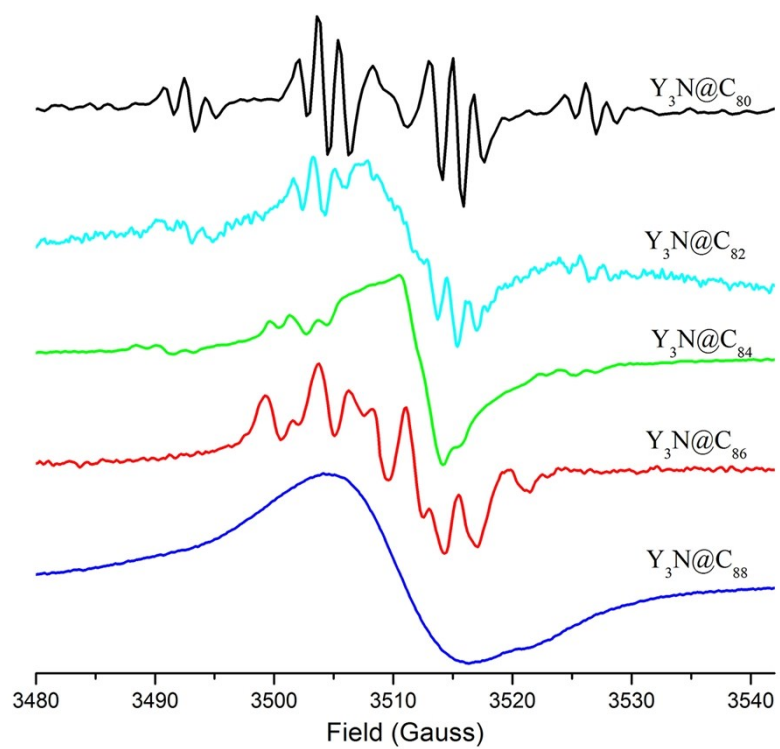

Figure S1. The ESR spectra of the K metal-reduced anion radicals of Y<sub>3</sub>N@C<sub>2n</sub> (N = 40 - 44) in THF at room temperature.

Table S1. The calculated  $d_{N-Y/C-Y/Y-Y}$  data. The  $d_{N-Y}$  represents the distance of nitrogen atom and yttrium atom on the  $Y_3N$  cluster; the  $d_{C-Y}$  represents the distance of yttrium atom and the nearest carbon atom on the cage, the  $d_{Y-Y}$  represents the distance of yttrium atoms on the  $Y_3N$  cluster.

| B3LYP TPSSh     |                 |                 |                 |                 |                 |                 |               |               |               |
|-----------------|-----------------|-----------------|-----------------|-----------------|-----------------|-----------------|---------------|---------------|---------------|
|                 | $d_{N-Y1}$      | $d_{N-Y2}$      | $d_{N-Y3}$      | $d_{C-Y1}$      | $d_{C-Y2}$      | $d_{C-Y3}$      | $d_{Y1-Y2}$   | $d_{Y2-Y3}$   | $d_{Y1-Y3}$   |
| $Y_3N@C_8$<br>0 | 2.059 2.0<br>59 | 2.057 <br>2.057 | 2.058 2.<br>058 | 2.434 2.<br>435 | 2.432 2.<br>432 | 2.431 2.<br>431 | 3.57 3.<br>57 | 3.57 3.<br>57 | 3.56 3.<br>56 |
| $Y_3N@C_8$<br>2 | 2.113 2.1<br>16 | 2.081 <br>2.090 | 2.082 2.<br>089 | 2.477 2.<br>471 | 2.385 2.<br>381 | 2.381 2.<br>381 | 3.64 3.<br>64 | 3.61 3.<br>58 | 3.64 3.<br>64 |
| $Y_3N@C_8$<br>4 | 2.124 2.1<br>37 | 2.141 <br>2.149 | 2.127 2.<br>137 | 2.541 2.<br>530 | 2.473 2.<br>469 | 2.481 2.<br>477 | 3.83 3.<br>81 | 3.44 3.<br>43 | 3.82 3.<br>80 |
| $Y_3N@C_8$<br>6 | 2.135 2.1<br>43 | 2.150 <br>2.160 | 2.157 2.<br>160 | 2.452 2.<br>441 | 2.474 2.<br>469 | 2.484 2.<br>481 | 3.86 3.<br>83 | 3.64 3.<br>64 | 3.68 3.<br>68 |
| $Y_3N@C_8$<br>8 | 2.196 2.2<br>03 | 2.172 <br>2.181 | 2.175 2.<br>179 | 2.452 2.<br>451 | 2.474 2.<br>470 | 2.493 2.<br>491 | 3.74 3.<br>73 | 3.75 3.<br>75 | 3.85 3.<br>85 |

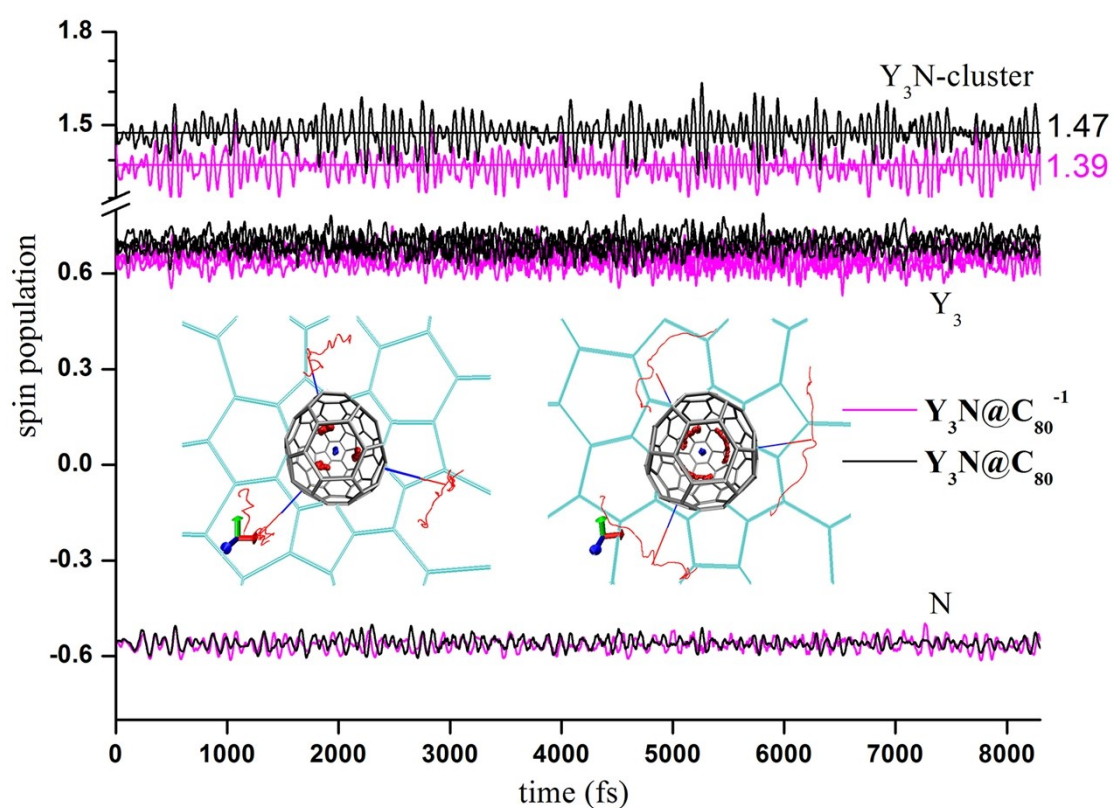

Figure S2. Molecular dynamics simulations (298K) of  $Y_3N@C_{80}$  and  $Y_3N@C_{80}^{-1}$ : Spin populations for the  $Y_3$ , N,  $Y_3N$ -cluster of neutral (black line) and anion radical (magenta line) of  $Y_3N@C_{80}$ ; trajectories (red for Y, blue for N, gray for carbon cage and light blue for carbon net) of the  $Y_3N$ -cluster is in the middle of chart, the central three-dimensional cage spread out to form a two-dimensional nets trajectories. Displacement of the carbon atoms is not shown.

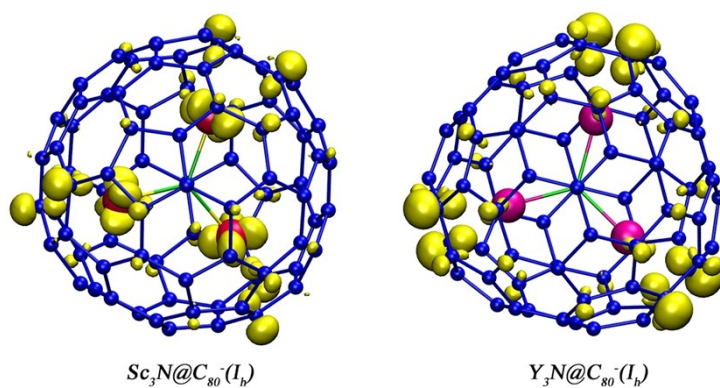

Figure S3. The spin differences of the anion radicals of  $\text{Sc}_3\text{N@C}_{80}(\text{I}_h)$  and  $\text{Y}_3\text{N@C}_{80}(\text{I}_h)$ .

Table S2. The  $d_{\text{N-plane}}$  and  $\Delta E$  of the clusters  $(\text{Y}_3\text{N})^{6+}$  in the optimized  $\text{Y}_3\text{N@C}_{80}$  to  $\text{Y}_3\text{N@C}_{88}$ .

| Type                                 | $\text{Sc}_3\text{N@C}_{80}$ | $\text{Y}_3\text{N@C}_{80}$ | $\text{Y}_3\text{N@C}_{82}$ | $\text{Y}_3\text{N@C}_{84}$ | $\text{Y}_3\text{N@C}_{86}$ | $\text{Y}_3\text{N@C}_{88}$ |
|--------------------------------------|------------------------------|-----------------------------|-----------------------------|-----------------------------|-----------------------------|-----------------------------|
| $^a d_{\text{N-plane}} (\text{\AA})$ | 0.002                        | 0.008                       | 0.197                       | 0.126                       | 0.057                       | 0.058                       |
| $\Delta E (\text{kcal/mol})$         | -                            | 0                           | -5.07                       | -14.02                      | -18.61                      | -22.87                      |

$^a d_{\text{N-plane}}$  means the distance of N atom from the plane composed of the three Y atoms.

## References

1. S. Stoll and A. Schweiger, *J. Magn. Reson.*, 2006, **178**, 42-55.
2. M. Frisch, G. Trucks, H. Schlegel, G. Scuseria, M. Robb, J. Cheeseman, G. Scalmani, V. Barone, B. Mennucci and G. Petersson, *Journal*, 2009.
3. F. Neese, *Wires Comput. Mol. Sci.*, 2012, **2**, 73-78.
4. CP2K: A general program to perform molecular dynamics simulations. Distributed under the terms of the GNU General Public Licence, <https://www.cp2k.org/about>.
5. J. VandeVondele, M. Krack, F. Mohamed, M. Parrinello, T. Chassaing and J. Hutter, *Comput. Phys. Commun.*, 2005, **167**, 103-128.
6. S. Goedecker, M. Teter and J. Hutter, *Phys. Rev. B*, 1996, **54**, 1703-1710.
7. G. Lippert, J. Hutter and M. Parrinello, *Theor. Chem. Acc.*, 1999, **103**, 124-140.
8. W. Humphrey, A. Dalke and K. Schulten, *J. Mol. Graph. Model.*, 1996, **14**, 33-38.
